# Supplementary material for: Characteristics of Gravelly Granite Residual Soil in Bored Pile Design: An In Situ Test in Shenzhen
Source: Hindawi journal article supplement (doi:10.1155/2018/7598154), 2018-01-01
Supplement: f1 [file 7598154.f1.zip]

Archive with 3 entries (3 files):
- 7598154.f1/Loading test.jpg
- 7598154.f1/Photo for reinforce bar cage and test instrument.jpg
- 7598154.f1/Photo for rotary drilling with casing advanced ahead.jpg
