# Supplementary figures and images for: Characteristics of Gravelly Granite Residual Soil in Bored Pile Design: An In Situ Test in Shenzhen
Source: Hindawi journal article supplement (doi:10.1155/2018/7598154), 2018-01-01

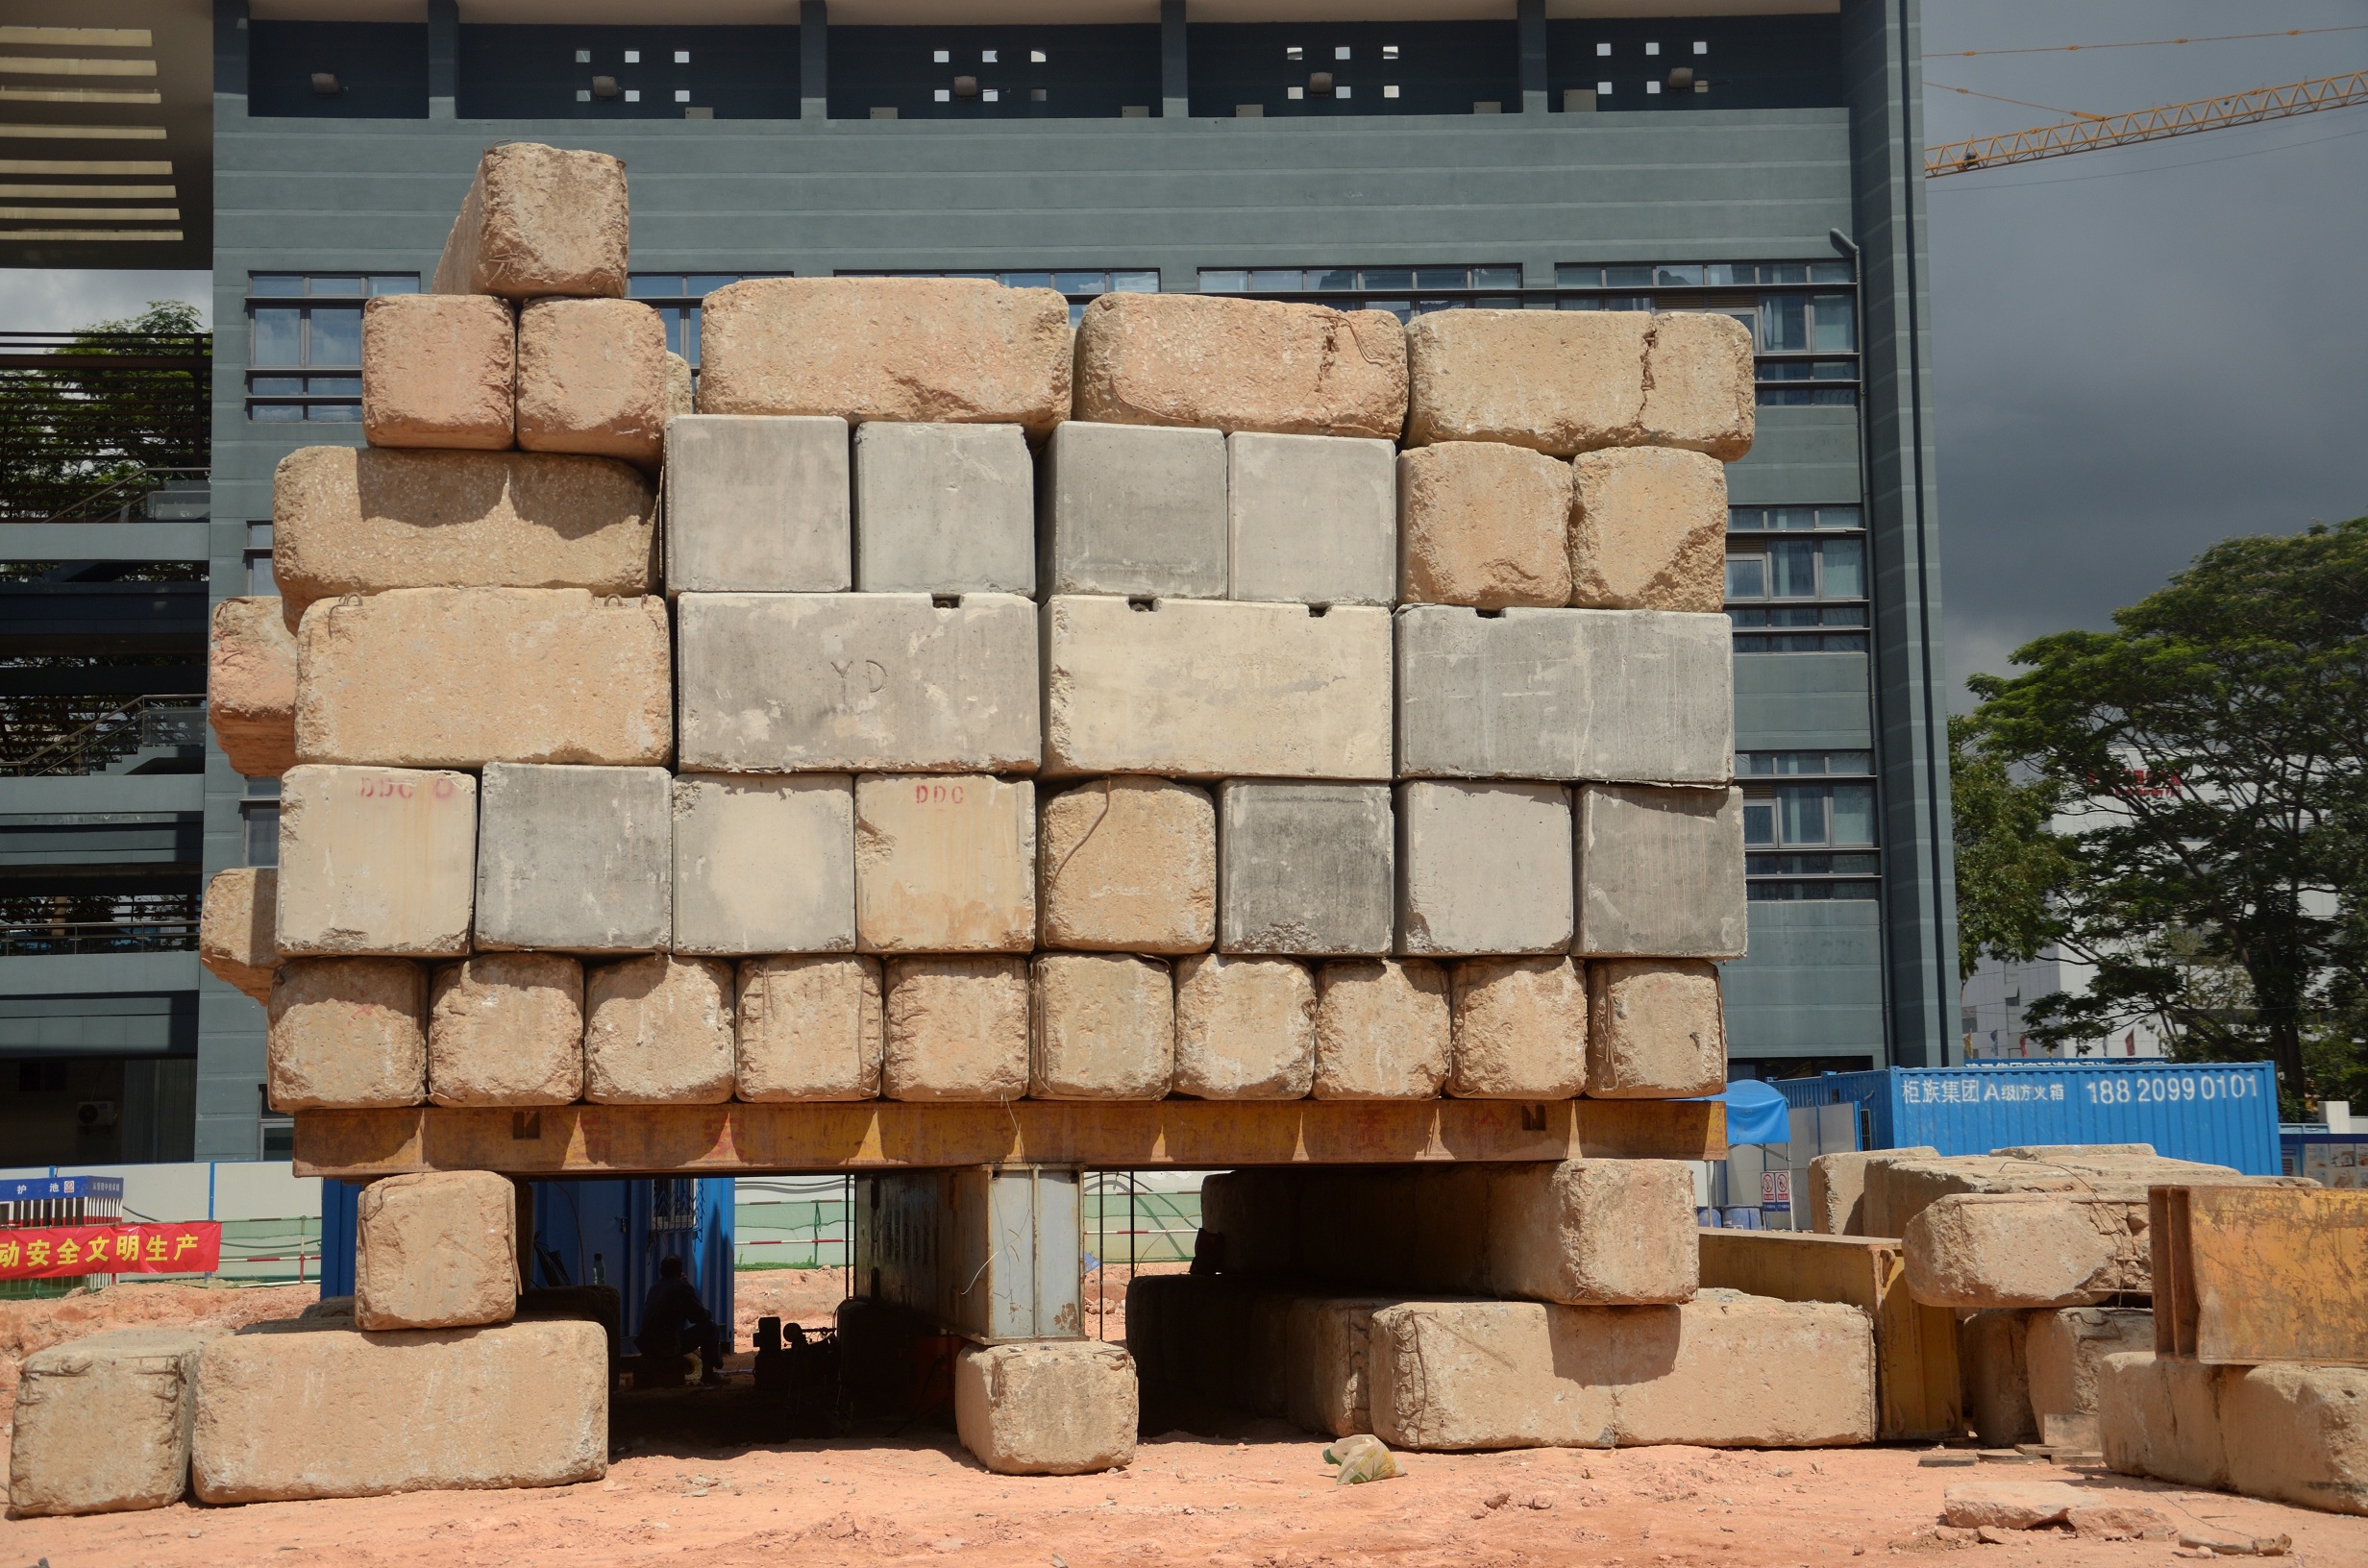

Supplement: f1 [file 7598154.f1.zip › 7598154.f1/Loading test.jpg]

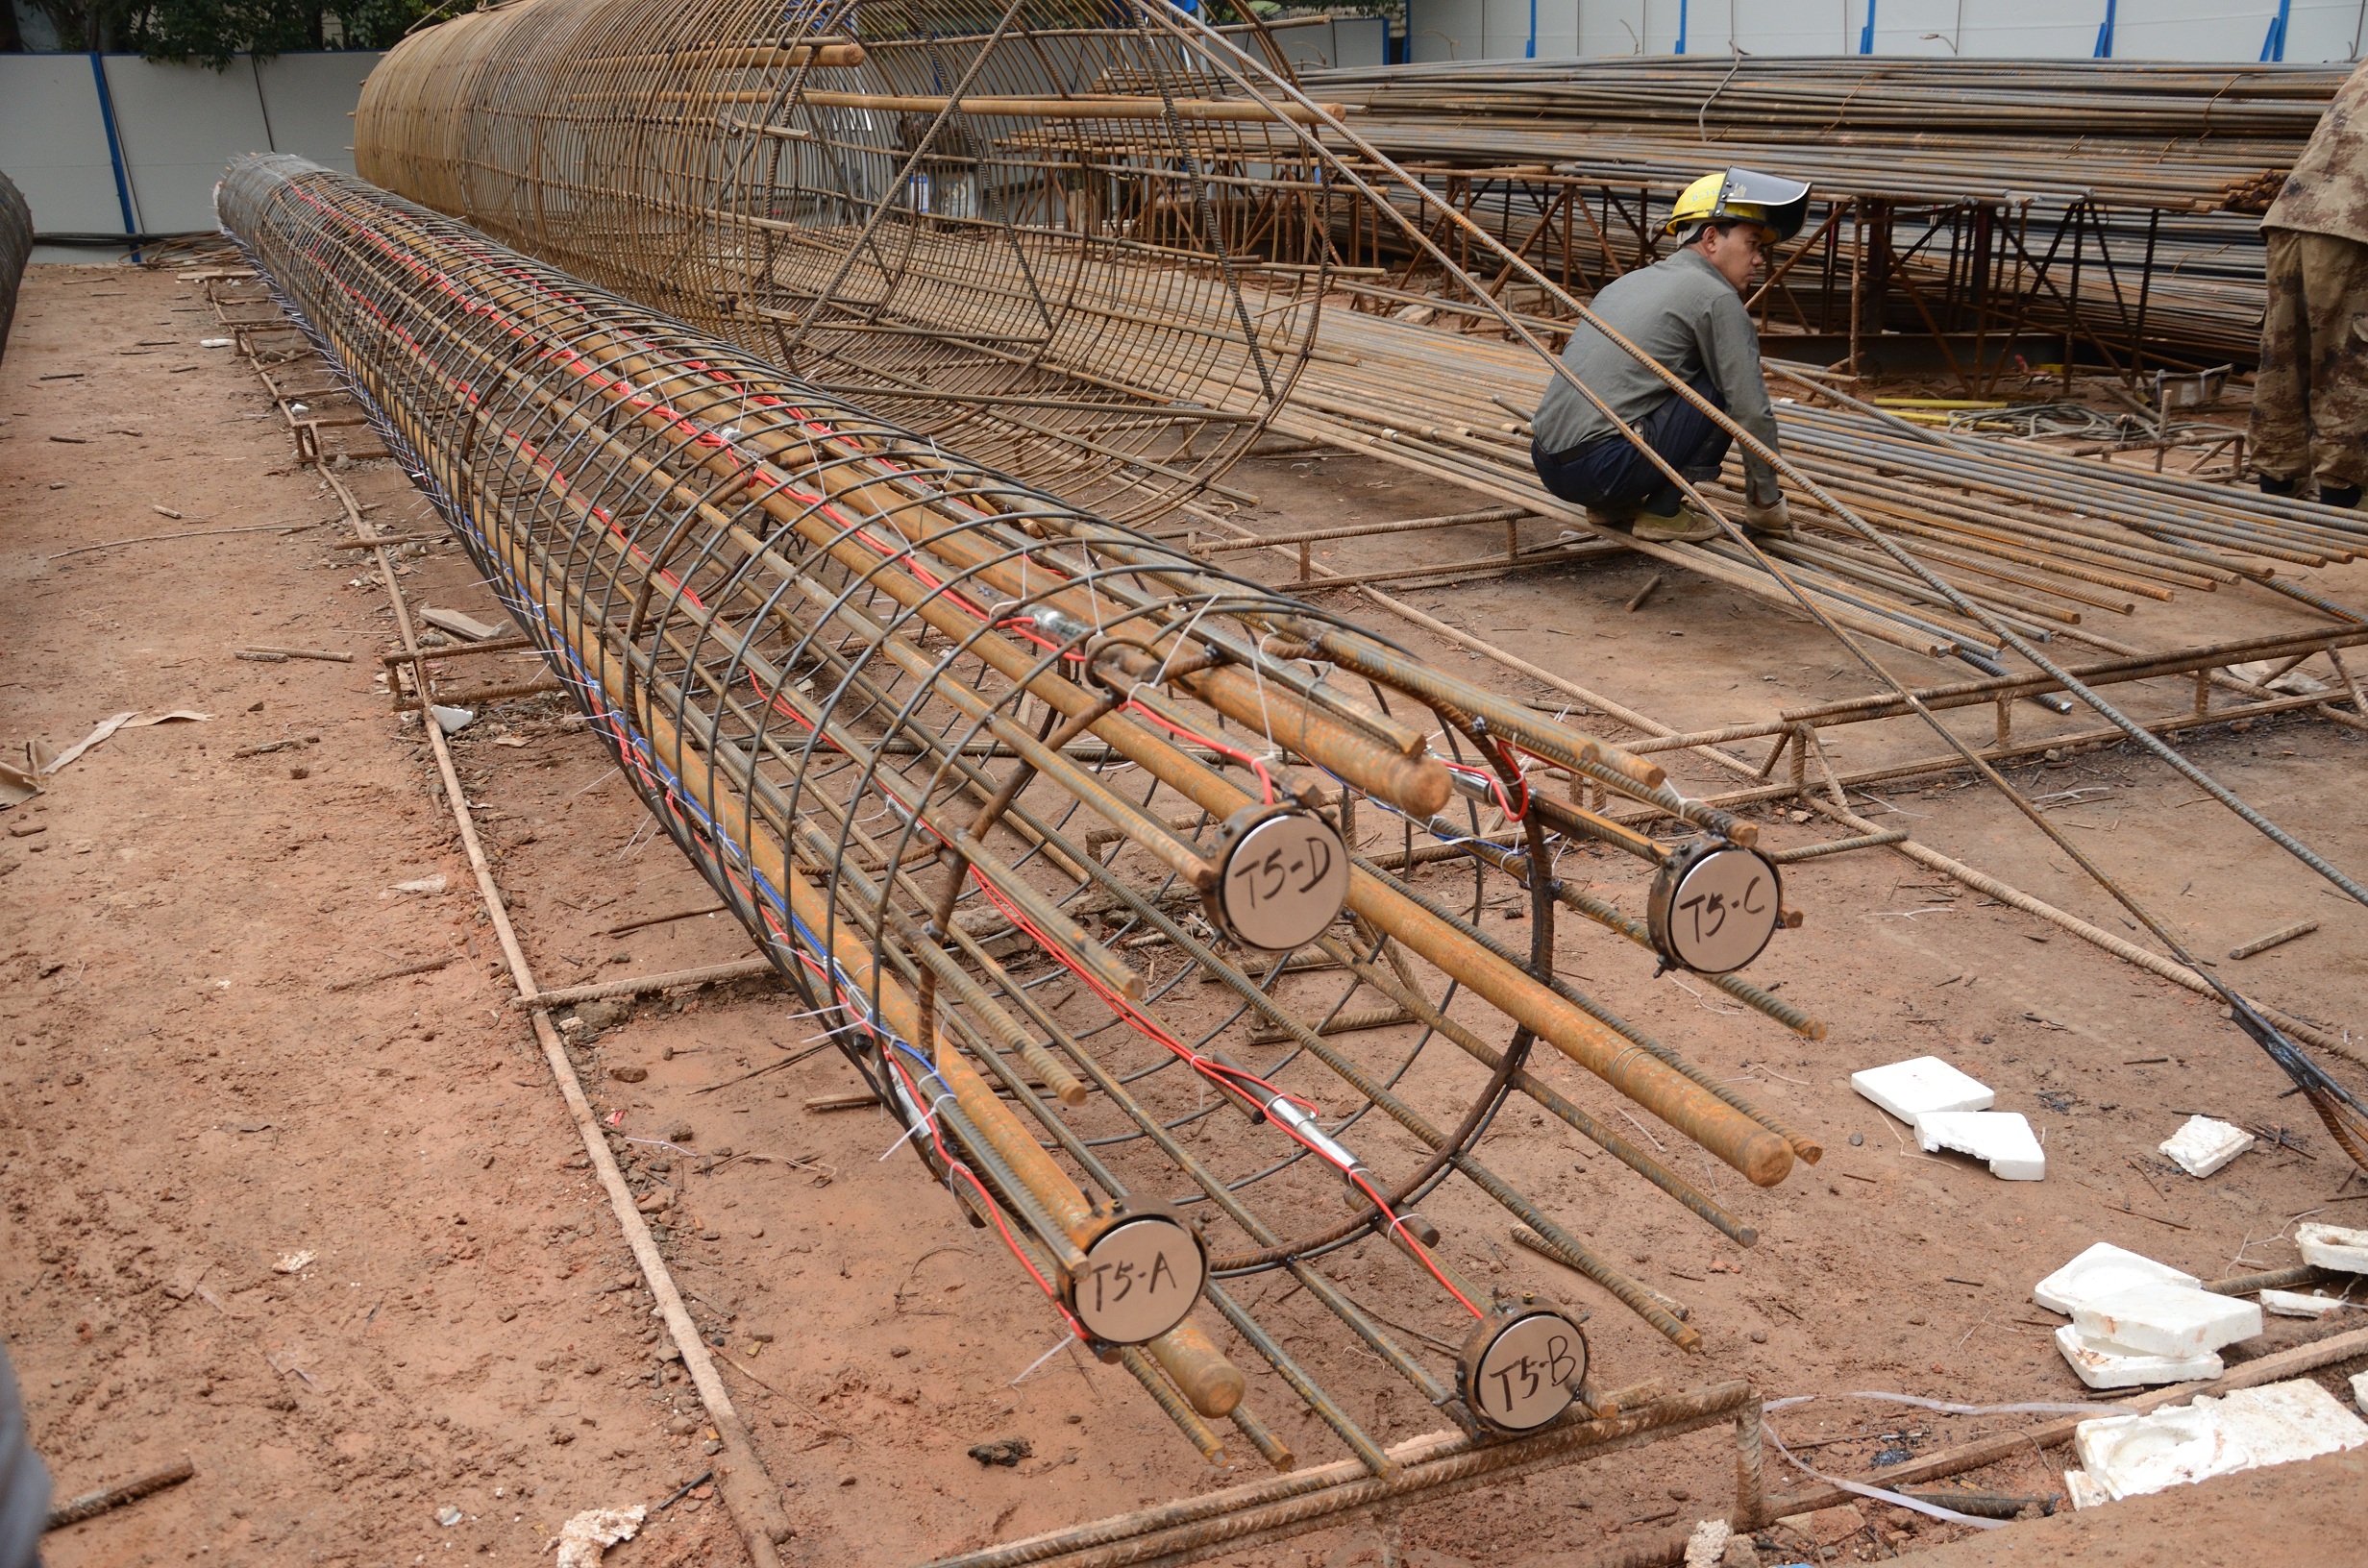

Supplement: f1 [file 7598154.f1.zip › 7598154.f1/Photo for reinforce bar cage and test instrument.jpg]

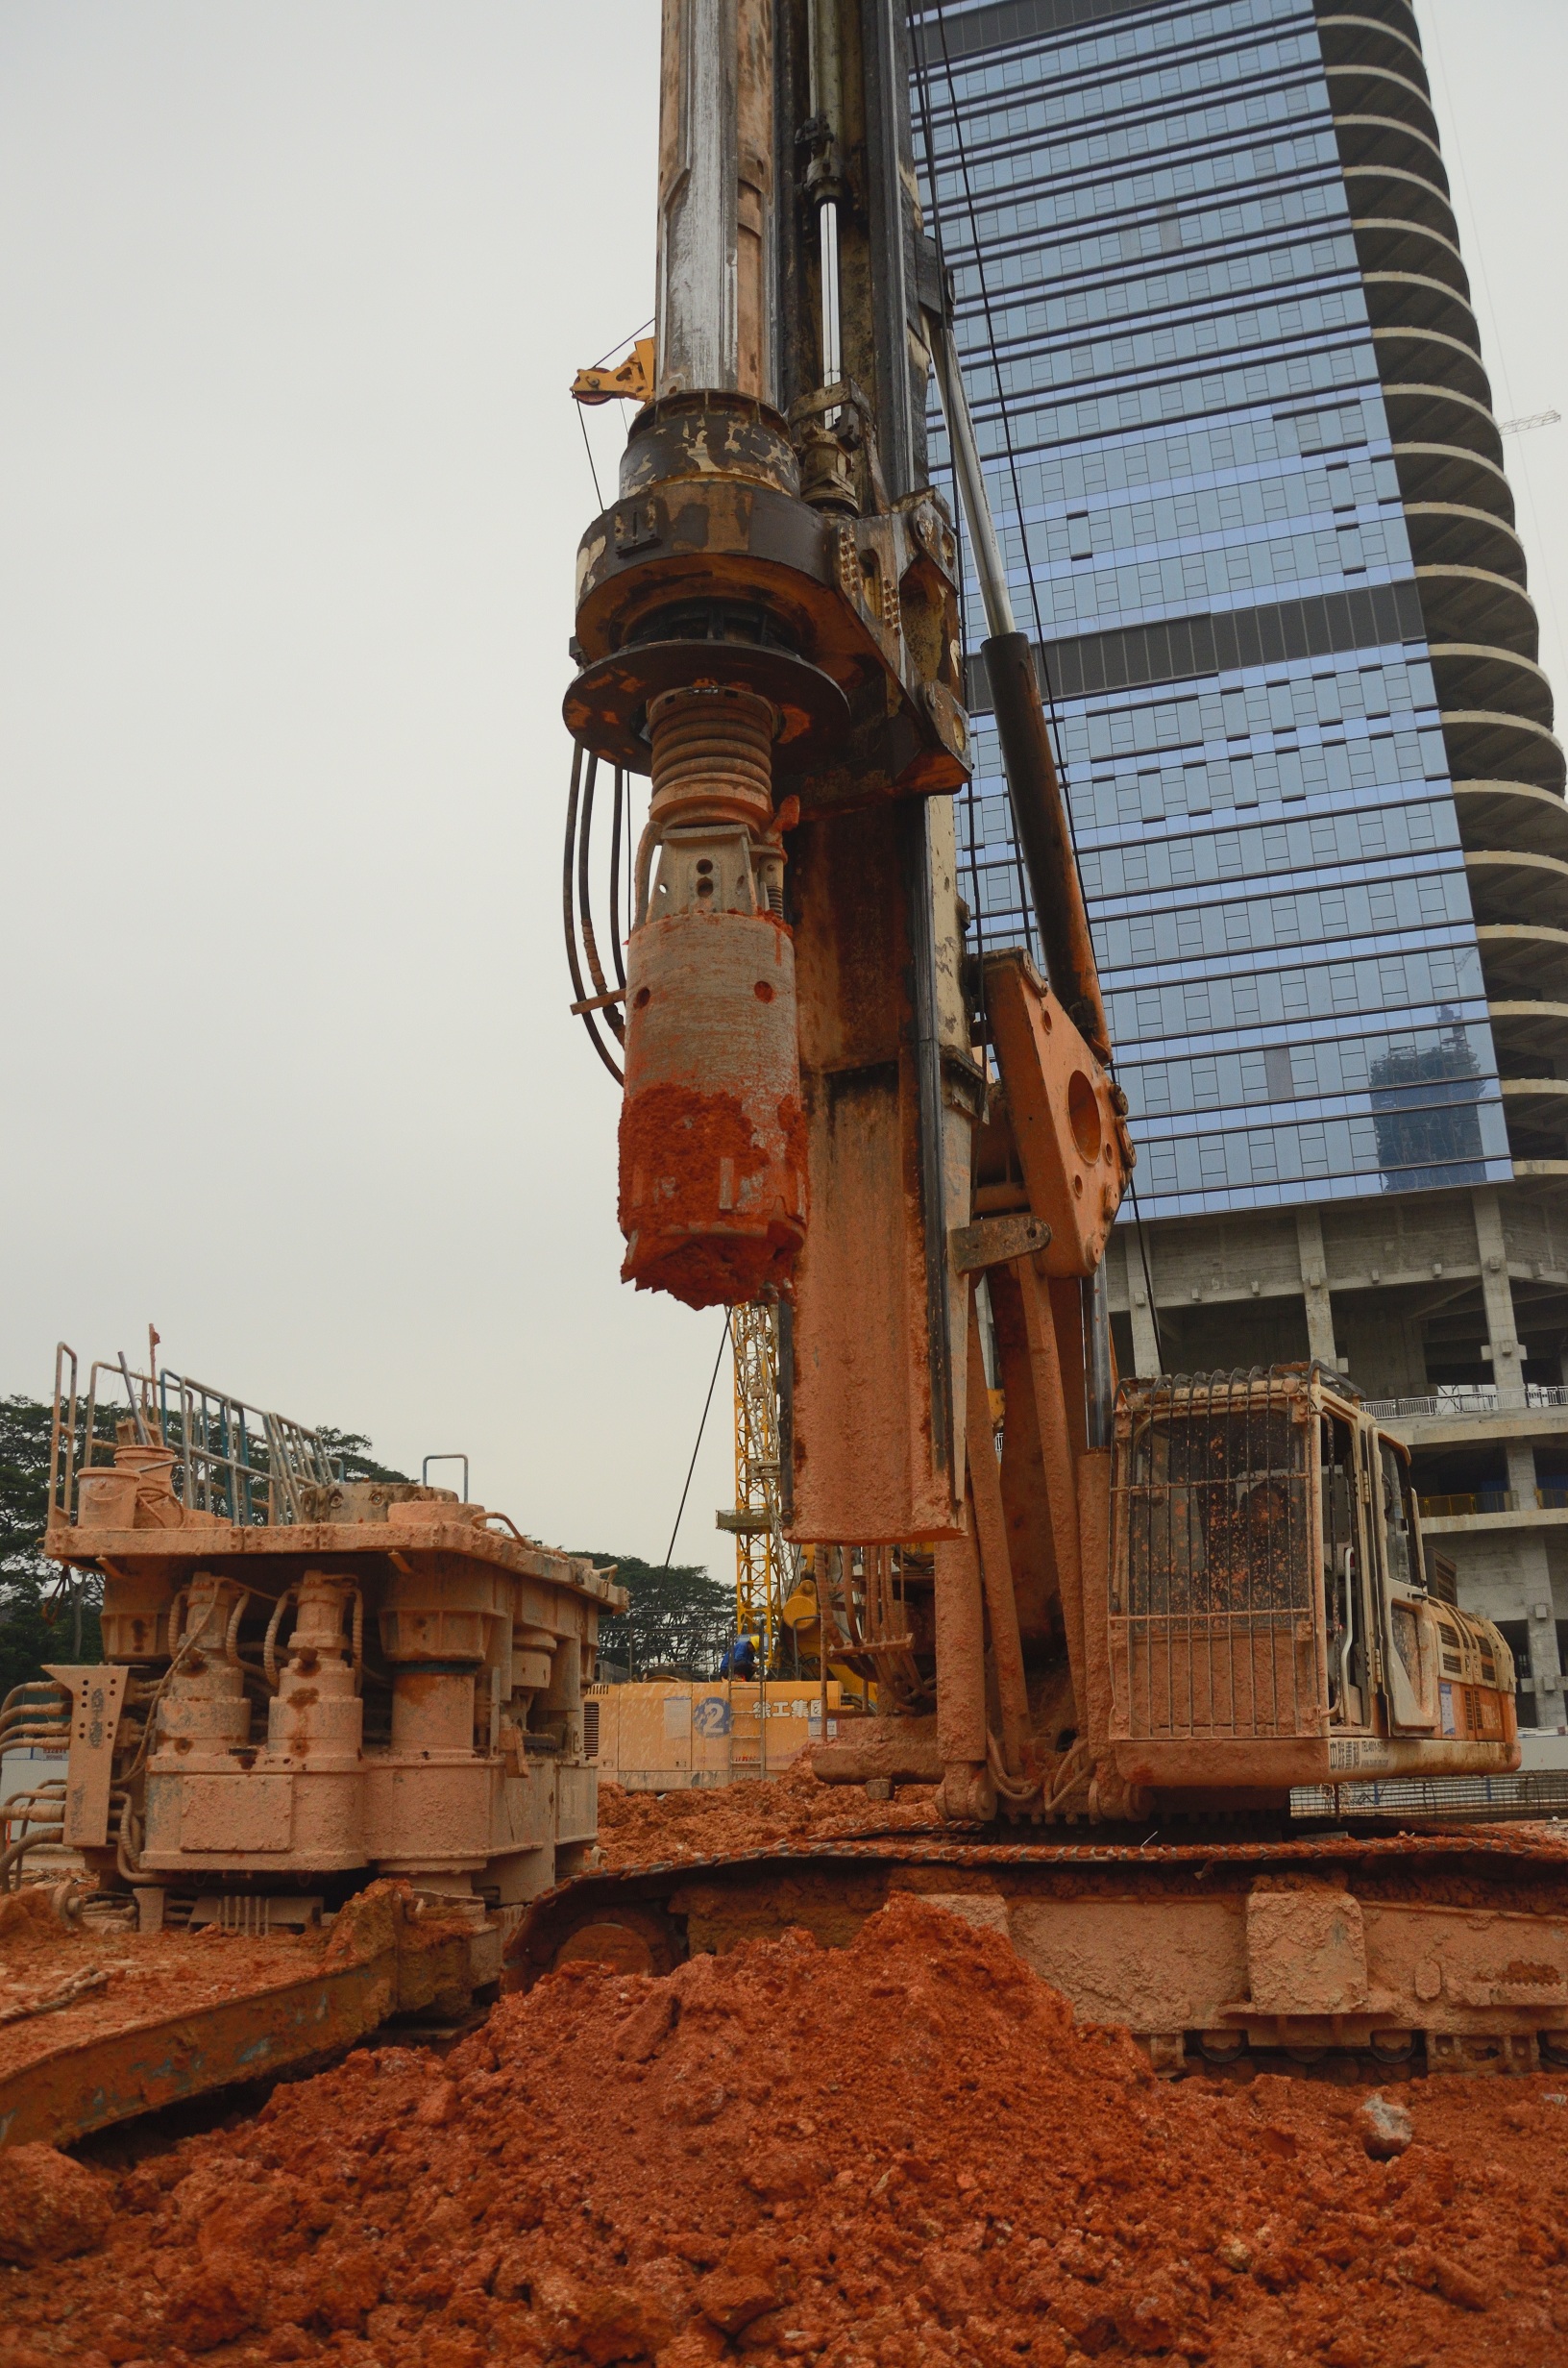

Supplement: f1 [file 7598154.f1.zip › 7598154.f1/Photo for rotary drilling with casing advanced ahead.jpg]
